# Supplementary material
Source: PubMed Central journal article supplement (PMC6322554)
Supplement: NIHMS1515694-supplement-Supp3.pdf [file NIHMS1515694-supplement-Supp3.pdf]

## Appendix C. A selection of current R packages for spatial data analysis

Table C1. Selected R packages for Movement Ecology

| Desired Analysis/Function                                    | Selected Packages                     |
|--------------------------------------------------------------|---------------------------------------|
| Importing, manipulating, projecting spatial vector data in R | sp, sf, rgeos                         |
| Importing, manipulating, projecting raster data in R         | raster, velox                         |
| Plotting spatial data in R                                   | ggplot2, mapview                      |
| Behavioral state analysis in R                               | moveHMM, bcpa                         |
| Manipulating movement data in R                              | move, adehabitatLT, BBMM, ctm         |
| Home range estimation in R                                   | adehabitatHR, tlocoh, move, BBMM, ctm |
| Habitat selection in R                                       | lme4, adehabitatHR                    |
| Connectivity in R                                            | grainscape, gdistance                 |
| Dynamic interaction analysis in R                            | wildlifeDI                            |

## Appendix C. - References

- Appelhans, T., *et al.*, 2017. mapview: Interactive Viewing of Spatial Data in R. R package version 2.2.1.
- Bates, D., *et al.*, 2015. Fitting Linear Mixed-Effects Models Using lme4. *Journal of Statistical Software*, 67 (1), 1–48.
- Bivand, R. and Rundel, C., 2017. rgeos: Interface to Geometry Engine - Open Source ('GEOS'). R package version 0.3-26.
- Bivand, R.S., Pebesma, E., and Gomez-Rubio, V., 2013. *Applied spatial data analysis with R, Second edition*. Springer, NY.
- Calenge, C., 2006. The package adehabitat for the R software: tool for the analysis of space and habitat use by animals. *Ecological Modelling*, 197, 1035.
- Fleming, C.H. and Calabrese, J.M., 2018. ctm: Continuous-Time Movement Modeling. R package version 0.5.0.
- Galpern, P., Doctolero, S., and Chubaty, A.M., 2017. grainscape: Efficient Modelling of Landscape Connectivity, Habitat, and Protected Area Networks. <https://achubaty.github.io/grainscape>.
- Gurarie, E., 2014. bcpa: Behavioral change point analysis of animal movement. R package version 1.1.
- Hijmans, R.J., 2017. raster: Geographic Data Analysis and Modeling. R package version 2.6-7.
- Hunziker, P., 2017. velox: Fast Raster Manipulation and Extraction. R package version 0.2.0.
- Kranstauber, B., Smolla, M., and Scharf, A.K., 2017. move: Visualizing and Analyzing Animal Track Data. R package version 3.0.2.

- Lyons, A., Getz, W., and R Development Core Team, 2017. T-LoCoH: Time Local Convex Hull Homorange and Time Use Analysis. R package version 1.40.04.
- Michelot, T., Langrock, R., and Patterson, T.A., 2016. moveHMM: an R package for the statistical modelling of animal movement data using hidden Markov models. *Methods in Ecology and Evolution*, 7 (11), 1308–1315.
- Nielson, *et al.*, 2013. BBMM: Brownian bridge movement model. R package version 3.0.
- Pebesma, E., 2018. sf: Simple Features for R. R package version 0.6-0.
- Pebesma, E.J. and Bivand, R.S., 2005. Classes and methods for spatial data in R. *R News*, 5 (2), 9–13.
- van Etten, J., 2017. R Package gdistance: Distances and Routes on Geographical Grids. *Journal of Statistical Software*, 76 (13), 1–21.
- Wickham, H., 2009. *ggplot2: Elegant Graphics for Data Analysis*. Springer-Verlag New York.
